# Supplementary material for: Solvent-Free Process for the Development of Photocatalytic Membranes
Source: PubMed Central journal article supplement (PMC6943574; doi:10.3390/molecules24244481), 2019-12-06
Supplement: molecules-24-04481-s001.pdf [file molecules-24-04481-s001.pdf]

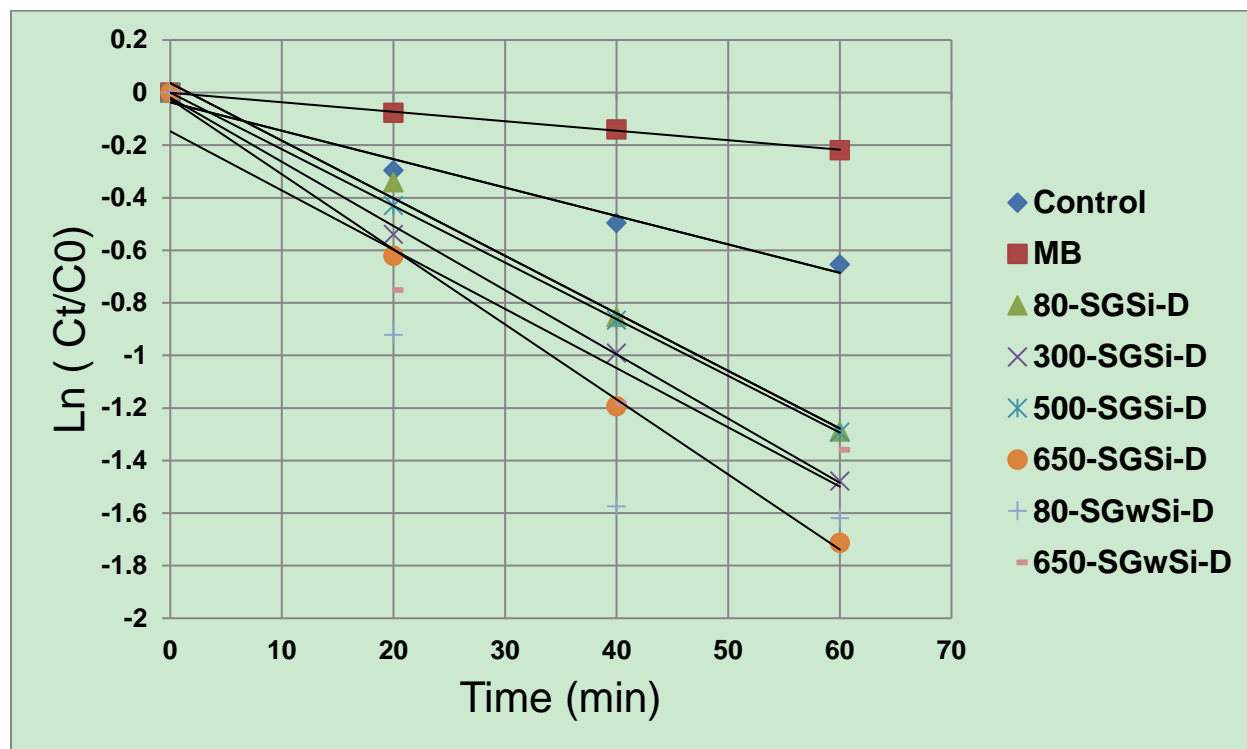

**Fig. S1.** Pseudo-first-order kinetics for the removal of methylene blue for membranes tested.

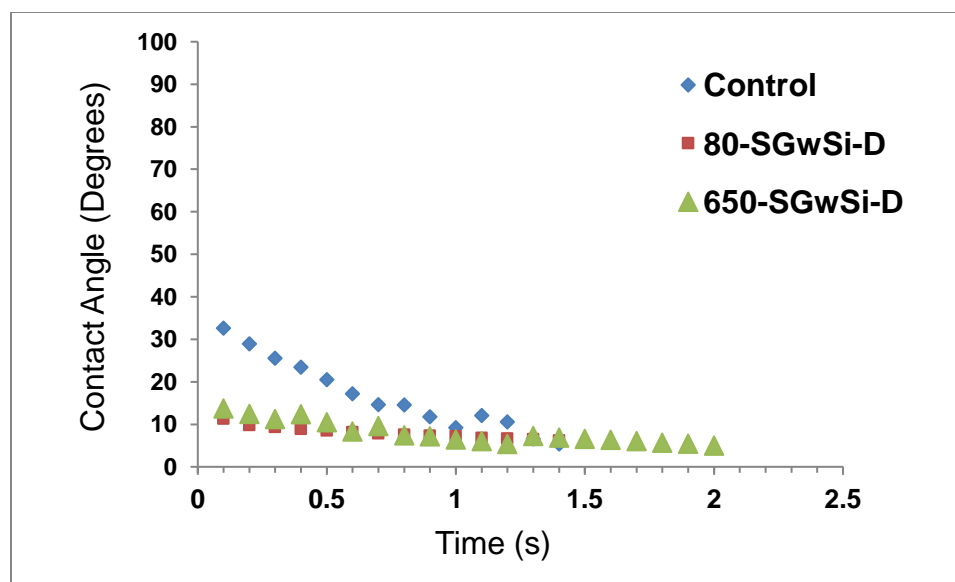

**Fig. S2** Comparison of the time course of water contact angle for **Control**, **80-SGwSi-D** and **650-SGwSi-D** modified substrates.
